# Supplementary material for: Characterization and expression of the cytochrome P450 gene family in diamondback moth, Plutella xylostella (L.)
Source: PubMed Central journal article supplement (PMC5155450; doi:10.1038/srep08952), 2015-03-10
Supplement: srep08952-s1.pdf [file srep08952-s1.pdf]

# Supplementary Information

1  
2  
3  
4  
5  
6  
7  
8  
9  
10  
11  
12  
13  
14  
15  
16  
17  
18

## **Characterization and expression of the cytochrome P450 gene family in diamondback moth, *Plutella xylostella* (L.)**

Liyong Yu<sup>1,2,3</sup>, Weiqi Tang<sup>1,2</sup>, Weiyi He<sup>1,3</sup>, Xiaoli Ma<sup>1,3</sup>, Liette Vasseur<sup>1,4</sup>, Simon W  
Baxter<sup>5</sup>, Guang Yang<sup>1,3</sup>, Shiguo Huang<sup>1,3</sup>, Fengqin Song<sup>1,2,3</sup>, Minsheng You<sup>1,3</sup>

<sup>1</sup> Institute of Applied Ecology, Fujian Agriculture and Forestry University, Fuzhou  
350002, China.

<sup>2</sup> Faculty of Life Sciences, Fujian Agriculture and Forestry University, Fuzhou  
350002, China.

<sup>3</sup> Key Laboratory of Integrated Pest Management for Fujian-Taiwan Crops, Ministry  
of Agriculture, Fuzhou 350002, China.

<sup>4</sup>Department of Biological Sciences, Brock University, St. Catharines, Ontario,  
Canada.

<sup>5</sup>School of Molecular & Biomedical Science, the University of Adelaide, Adelaide,  
South Australia, Australia.

19 **This file includes:**

20 **Table S1~S2**

21 **Figures S1~S5**

22

23 **Table S1** Cytochrome P450 genes in *P. xylostella*.

| No. | Gene CDS ID | Cytochrome P450 name | Protein length | Scaffold location | Gene start site | Gene end site | Gene length | No. of exon |
|-----|-------------|----------------------|----------------|-------------------|-----------------|---------------|-------------|-------------|
| 1   | Px000631.1  | CYP341G1             | 448            | scaffold_106      | 535778          | 541121        | 5344        | 8           |
| 2   | Px000833.1  | CYP367A4             | 556            | scaffold_109      | 1288791         | 1297112       | 8322        | 10          |
| 3   | Px000834.1  | CYP367B5             | 500            | scaffold_109      | 1303983         | 1311031       | 7049        | 10          |
| 4   | Px000924.2  | CYP340V1v1           | 494            | scaffold_11       | 200786          | 212000        | 11215       | 10          |
| 5   | Px000926.1  | CYP340V2v1           | 424            | scaffold_11       | 223579          | 232025        | 8477        | 8           |
| 6   | Px001368.1  | CYP367B5v2           | 215            | scaffold_1179     | 13947           | 16730         | 2784        | 4           |
| 7   | Px002079.1  | CYP340AF1            | 458            | scaffold_130      | 925350          | 930821        | 5472        | 9           |
|     | Px002080.1  |                      |                |                   |                 |               |             |             |
| 8   | Px002082.2b | CYP340T1             | 503            | scaffold_130      | 950638          | 958947        | 8310        | 10          |
| 9   | Px002082.2a | CYP340S1v1           | 493            | scaffold_130      | 961179          | 978354        | 17176       | 10          |
| 10  | Px002083.1  | CYP340Y1             | 479            | scaffold_130      | 1000916         | 1010810       | 9895        | 10          |
| 11  | Px002092.2  | CYP4S10              | 507            | scaffold_130      | 1235035         | 1247351       | 12317       | 10          |
| 12  | Px002515.1  | CYP305B1             | 488            | scaffold_14       | 52466           | 59966         | 7501        | 8           |
| 13  | Px002723.1  | CYP6CV2              | 505            | scaffold_140      | 953589          | 955357        | 1769        | 2           |
| 14  | Px002776.1b | CYP340V1v2           | 346            | scaffold_141      | 688428          | 693615        | 5188        | 7           |
| 15  | Px002776.1a | CYP340V2v2           | 403            | scaffold_141      | 697194          | 704079        | 7538        | 7           |
| 16  | Px002858.1  | CYP304F9v2           | 363            | scaffold_144      | 157394          | 161092        | 3699        | 6           |
| 17  | Px003086.1  | CYP6BD11             | 527            | scaffold_148      | 1607990         | 1626691       | 18702       | 6           |
| 18  | Px003246.1  | CYP6AE45             | 520            | scaffold_15       | 2271373         | 2275194       | 3822        | 2           |
| 19  | Px003485.1  | CYP9G11v1            | 466            | scaffold_154      | 219752          | 226769        | 7018        | 10          |
| 20  | Px003987.1  | CYP367A5v2           | 162            | scaffold_1625     | 416             | 2553          | 2138        | 3           |
| 21  | Px004291.1  | CYP302A1v1           | 515            | scaffold_17       | 1656307         | 1660850       | 4544        | 9           |
| 22  | Px004643.1  | CYP6AB28             | 512            | scaffold_18       | 104121          | 106032        | 1912        | 2           |
| 23  | Px004650.2  | CYP367A5             | 534            | scaffold_18       | 201458          | 209934        | 8477        | 10          |
| 24  | Px004651.2  | CYP367B4v2           | 484            | scaffold_18       | 216878          | 225966        | 9089        | 12          |
| 25  | Px004867.2  | CYP340W1v2           | 426            | scaffold_185      | 426584          | 441472        | 14889       | 8           |
| 26  | Px004951.2  | CYP4DK1v1            | 505            | scaffold_187      | 507838          | 516624        | 8787        | 11          |
| 27  | Px005514.4  | CYP366C1             | 508            | scaffold_20       | 363581          | 372702        | 9122        | 10          |
| 28  | Px005515.2  | CYP366C2             | 525            | scaffold_20       | 377563          | 387967        | 10405       | 11          |
| 29  | Px005621.2  | CYP4DK1v2            | 452            | scaffold_201      | 206890          | 210613        | 3724        | 10          |
| 30  | Px005900.1  | CYP6BG6              | 524            | scaffold_21       | 1278550         | 1281643       | 3094        | 3           |
|     | Px005901.1  |                      |                |                   |                 |               |             |             |
| 31  | Px005902.4  | CYP6BG4              | 519            | scaffold_21       | 1287549         | 1289300       | 1752        | 2           |
| 32  | Px006053.5b | CYP4M22              | 503            | scaffold_214      | 48369           | 56675         | 8307        | 8           |
| 33  | Px006053.5a | CYP4M23              | 508            | scaffold_214      | 57398           | 61660         | 4263        | 9           |
| 34  | Px006271.1  | CYP367B4             | 500            | scaffold_220      | 512431          | 519173        | 6743        | 10          |
| 35  | Px006272.1  | CYP367A5v3           | 162            | scaffold_220      | 529897          | 531867        | 1971        | 4           |
| 36  | Px006839.1  | CYP340X1             | 466            | scaffold_240      | 366112          | 376657        | 10546       | 10          |
| 37  | Px007099.1  | CYP4G78              | 563            | scaffold_25       | 1012110         | 1018813       | 6704        | 10          |

| <b>No.</b> | <b>Gene CDS ID</b> | <b>Cytochrome P450 name</b> | <b>Protein length</b> | <b>Scaffold location</b> | <b>Gene start site</b> | <b>Gene end site</b> | <b>Gene length</b> | <b>No. of exon</b> |
|------------|--------------------|-----------------------------|-----------------------|--------------------------|------------------------|----------------------|--------------------|--------------------|
| 38         | Px007213.1         | CYP340U1v1                  | 559                   | scaffold_254             | 6413                   | 12905                | 8305               | 12                 |
| 39         | Px007214.1         | CYP340U2                    | 298                   | scaffold_254             | 26018                  | 34339                | 8322               | 6                  |
| 40         | Px007338.1         | CYP333B15                   | 503                   | scaffold_26              | 560386                 | 564771               | 4386               | 9                  |
| 41         | Px007339.2         | CYP333B16                   | 502                   | scaffold_26              | 566773                 | 570392               | 3620               | 9                  |
| 42         | Px007344.4         | CYP333A5                    | 508                   | scaffold_26              | 724089                 | 727671               | 3583               | 9                  |
| 43         | Px007583.1         | CYP307A1                    | 539                   | scaffold_27              | 494517                 | 502133               | 7617               | 2                  |
| 44         | Px008026.1         | CYP4G77                     | 560                   | scaffold_286             | 50304                  | 54942                | 4639               | 7                  |
| 45         | Px008489.1         | CYP6CN1                     | 496                   | scaffold_30              | 1210747                | 1217884              | 7138               | 3                  |
| 46         | Px008532.1         | CYP340U1v2                  | 415                   | scaffold_30              | 2113381                | 2124856              | 11476              | 9                  |
| 47         | Px008537.1         | CYP340W1v1                  | 495                   | scaffold_30              | 2251972                | 2261032              | 9061               | 9                  |
| 48         | Px009062.1         | CYP304F-1                   | 146                   | scaffold_32              | 145580                 | 151208               | 5630               | 3                  |
| 49         | Px009291.1         | CYP304F8                    | 478                   | scaffold_329             | 282849                 | 296335               | 13487              | 8                  |
|            | Px009292.1         |                             |                       |                          |                        |                      |                    |                    |
|            | Px009293.1         |                             |                       |                          |                        |                      |                    |                    |
| 50         | Px009407.1         | CYP428A1v2                  | 549                   | scaffold_331             | 315475                 | 322803               | 7329               | 11                 |
| 51         | Px009572.1         | CYP338C1                    | 472                   | scaffold_34              | 928224                 | 931458               | 3235               | 2                  |
| 52         | Px009934.1         | CYP365A2                    | 456                   | scaffold_358             | 28588                  | 34920                | 6333               | 8                  |
| 53         | Px009935.1         | CYP365A5                    | 169                   | scaffold_358             | 44166                  | 52002                | 7837               | 4                  |
| 54         | Px010671.1         | CYP339A3                    | 493                   | scaffold_393             | 121828                 | 127053               | 5226               | 10                 |
| 55         | Px010920.1         | CYP340Z1                    | 456                   | scaffold_403             | 93788                  | 106621               | 12834              | 11                 |
| 56         | Px011058.5         | CYP314A1                    | 525                   | scaffold_410             | 156902                 | 168437               | 11536              | 9                  |
| 57         | Px011481.1         | CYP15C1                     | 441                   | scaffold_436             | 180461                 | 185272               | 4812               | 8                  |
| 58         | Px011483.1         | CYP429A1                    | 437                   | scaffold_436             | 191369                 | 194940               | 3572               | 8                  |
| 59         | Px011722.1         | CYP301A1                    | 519                   | scaffold_45              | 130150                 | 145519               | 15370              | 8                  |
| 60         | Px011724.2         | CYP301B1                    | 550                   | scaffold_45              | 156061                 | 170376               | 14316              | 12                 |
| 61         | Px011849.1         | CYP302A1v2                  | 476                   | scaffold_455             | 200185                 | 204370               | 4186               | 8                  |
| 62         | Px012360.1         | CYP304F-2                   | 153                   | scaffold_484             | 199097                 | 201835               | 2739               | 3                  |
| 63         | Px012411.1         | CYP18B1                     | 565                   | scaffold_49              | 30802                  | 37118                | 6317               | 7                  |
| 64         | Px012412.2         | CYP18A1                     | 522                   | scaffold_49              | 60494                  | 63210                | 2717               | 7                  |
| 65         | Px012658.1         | CYP49A1                     | 503                   | scaffold_50              | 610535                 | 617485               | 6951               | 8                  |
| 66         | Px013017.1         | CYP6CT3                     | 518                   | scaffold_52              | 1254475                | 1256852              | 2378               | 5                  |
| 67         | Px013063.1         | CYP340S1v2                  | 418                   | scaffold_522             | 117690                 | 128766               | 11077              | 8                  |
| 68         | Px013091.1         | CYP428A1                    | 469                   | scaffold_526             | 48482                  | 58721                | 10240              | 9                  |
| 69         | Px013145.1         | CYP6BF1                     | 514                   | scaffold_53              | 266651                 | 268456               | 1806               | 2                  |
| 70         | Px013454.1         | CYP6FM1                     | 549                   | scaffold_552             | 47611                  | 49492                | 1882               | 2                  |
| 71         | Px013707.2         | CYP341A12                   | 509                   | scaffold_579             | 90391                  | 101147               | 10757              | 10                 |
| 72         | Px013884.1         | CYP9G11v2                   | 517                   | scaffold_59              | 1385465                | 1396016              | 10552              | 10                 |
| 73         | Px013958.1         | CYP321E1                    | 500                   | scaffold_6               | 239033                 | 241012               | 1980               | 2                  |
| 74         | Px014069.1         | CYP315A1                    | 461                   | scaffold_600             | 90089                  | 99740                | 9652               | 7                  |
| 75         | Px014216.1         | CYP6BG5                     | 521                   | scaffold_613             | 47293                  | 49077                | 1785               | 2                  |
| 76         | Px014217.1         | CYP6BG3                     | 523                   | scaffold_613             | 58716                  | 60633                | 1918               | 2                  |
| 77         | Px014440.2         | CYP354A8                    | 517                   | scaffold_629             | 18899                  | 24482                | 5584               | 10                 |

| <b>No.</b> | <b>Gene CDS ID</b>       | <b>Cytochrome P450 name</b> | <b>Protein length</b> | <b>Scaffold location</b> | <b>Gene start site</b> | <b>Gene end site</b> | <b>Gene length</b> | <b>No. of exon</b> |
|------------|--------------------------|-----------------------------|-----------------------|--------------------------|------------------------|----------------------|--------------------|--------------------|
| 78         | Px014651.1               | CYP6AN14                    | 514                   | scaffold_65              | 303284                 | 306224               | 2941               | 2                  |
| 79         | Px014978.1               | CYP9G10                     | 520                   | scaffold_68              | 366776                 | 371019               | 4244               | 9                  |
| 80         | Px014981.1               | CYP9G4                      | 519                   | scaffold_68              | 524542                 | 532510               | 7969               | 10                 |
| 81         | Px014982.1<br>Px014984.1 | CYP9G2                      | 521                   | scaffold_68              | 534795                 | 541015               | 6221               | 10                 |
| 82         | Px015762.1               | CYP4AU6                     | 474                   | scaffold_74              | 272693                 | 278565               | 5873               | 10                 |
| 83         | Px015922.1               | CYP303A1                    | 500                   | scaffold_75              | 703659                 | 709650               | 5992               | 3                  |
| 84         | Px016740.1               | CYP365A3P                   | 527                   | scaffold_83              | 203727                 | 211127               | 7401               | 10                 |
| 85         | Px017253.1               | CYP6AE46                    | 516                   | scaffold_9               | 1531564                | 1533352              | 1789               | 2                  |

24

25

26 **Table S2 Primers used for qRT-PCR.**

27

| No. | P450s     | Sense primer              | Anti-sense primer          | Sense primer T <sub>m</sub> (°C) | Anti-sense primer T <sub>m</sub> (°C) | Product length (bps) |
|-----|-----------|---------------------------|----------------------------|----------------------------------|---------------------------------------|----------------------|
| 1   | CYP307A1  | CTCGTGGTCAATAGTTTGGATAGGA | GAAGAGTTGGTGGAAACCGCAT     | 61.8                             | 61.4                                  | 99                   |
| 2   | CYP314A1  | CCAATGAAGGAAGGGTTTAGGC    | TGACGATGAGGAAGAGGAGGG      | 62                               | 61.3                                  | 128                  |
| 3   | CYP315A1  | CAGGTGCTGTTGGCTAAGTTGC    | CGTCAGGTGCGTACATGAAGGT     | 62.5                             | 62.4                                  | 94                   |
| 4   | CYP18A1   | GCGAGGTCCACGAGTTGATTG     | GACATGGTGATGCCACAGATGAC    | 62.7                             | 62.2                                  | 112                  |
| 5   | CYP4G77   | GTCTCGCTTTCTTGGACCTGC     | GGTGTCTGTGACCCTCGAACAT     | 61.4                             | 61.8                                  | 110                  |
| 6   | CYP4G78   | CGCAGAACGGAACCTCACAACAT   | CCAAGGAGGCACAGCACGA        | 62.5                             | 62.5                                  | 118                  |
| 7   | CYP301A1  | GCGGCTAGGATGCCTGTCTT      | GCCAGTAGGGTGCCTTCAGTTC     | 61.8                             | 62.7                                  | 119                  |
| 8   | CYP6BF1   | CATAACGGGAGACAGCATTGACA   | TGGAAGCCAGCTTGAAGAAC       | 62.5                             | 61.8                                  | 117                  |
| 9   | CYP6BG4   | CGACAGAACCTCACGCCACT      | TCCTCACTTCTACTGCGTCACTCA   | 60.7                             | 61.7                                  | 133                  |
| 10  | CYP6BG3   | TTTGAAGTGTCGGTATTAAGAGGCT | GAAGAACGCAGGTATTGTGGG      | 61.2                             | 61.3                                  | 111                  |
| 11  | CYP4M22   | CAAGAGTTGCGTGAGATATTCGG   | GAAGCGTCTCCTTGATACAGCA     | 61.7                             | 59.7                                  | 100                  |
| 12  | CYP4M23   | CTTCGCTTGTTTCTCCTGTGT     | GCATACTCGCCATTTCTCA        | 61.1                             | 62.4                                  | 100                  |
| 13  | CYP6BD11  | ACCTCCGCCGCTTCACTCT       | CGCACTGGTCCACAAACTTCAT     | 63.3                             | 62.3                                  | 142                  |
| 14  | CYP305B1  | GATAAGCCTAATGACTTCAACCCAG | TGATTCGCTAACGCATCTCCT      | 60.9                             | 61.7                                  | 126                  |
| 15  | CYP6CN1   | AGGATTTCTTCTACGGCATGGTTC  | TTGTCTCCCTCGTGCTTCTTCA     | 63                               | 62.3                                  | 139                  |
| 16  | CYP9G10   | AGAAGGAGGGAAAACAGTGAAA    | CAGGCTCTGGGTAATACTGTTTCG   | 59.7                             | 60.9                                  | 95                   |
| 17  | CYP9G4    | GCTGTCCGCATTCATACCTTTC    | CCGCGTCTTCTCGCACTTC        | 61.4                             | 61.5                                  | 133                  |
| 18  | CYP9G11v1 | CGTGAGCGAGACCATGCAGTA     | CTTTCTTAGCCTCCATAAGCAGTTGT | 62                               | 62.3                                  | 83                   |
| 19  | CYP6CV2   | ATGACAAGGTGGCGAAACTGG     | GCTCGTGGATGAGGAAGGACA      | 62.2                             | 62.2                                  | 117                  |
| 20  | CYP301B1  | GAGTATTCACCTCTTCTCCAGTT   | CACATTCGCTTCCCGTATCCA      | 62.9                             | 63.1                                  | 113                  |

28

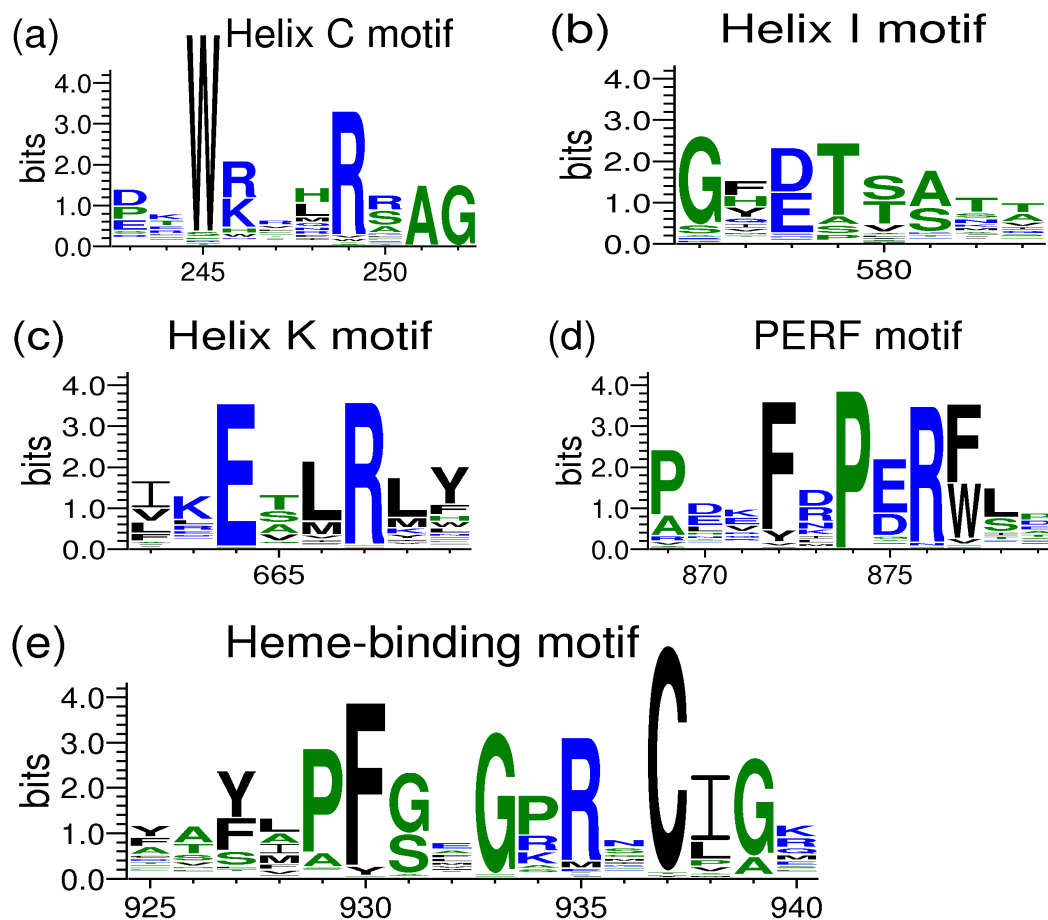

30

31 **Figure S1 Five conserved domains of the cytochrome P450s in *P. xylostella*.** The

32 horizontal axis is the position of amino acids over the entire length of the alignment

33 (1021); the vertical axis represents the information content in bits. Seventy-seven

34 *PxP450* protein sequences were aligned by ClustalX2, and their conserved motif

35 logos were generated using the online WebLogo program. (a) The helix C motif

36 (WxxxR) sequence logo. (b) The helix I motif (Gx[ED]T[TS]) sequence logo. (c)

37 The helix K motif (ExLR) sequence logo. (d) The PERF motif (PxxFxp[ED]R)

38 sequence logo. (e) The heme-binding motif (PFxxGxRxCx[GA]) sequence logo.

39

40

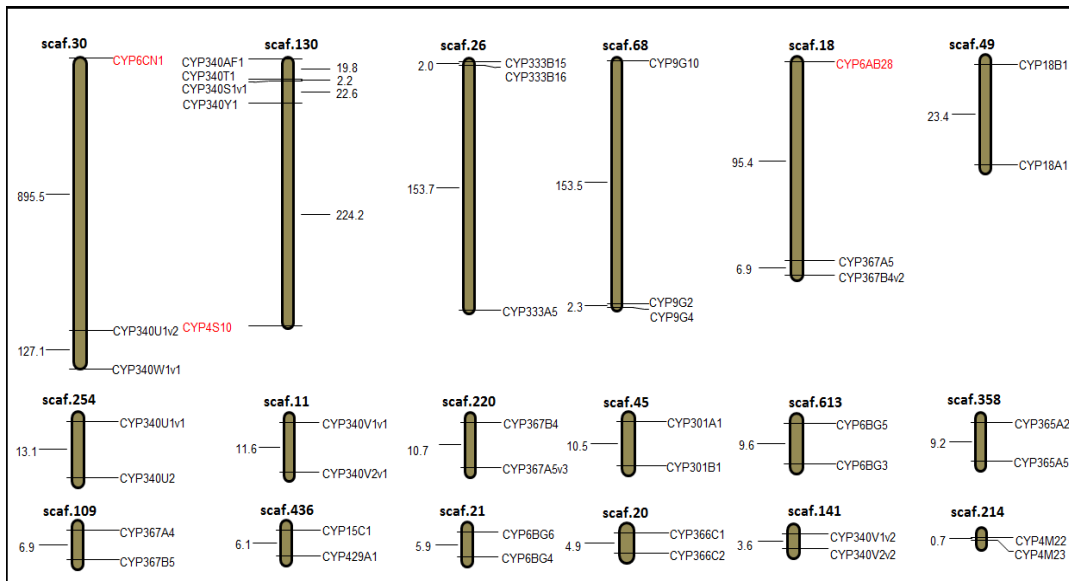

41

42

43 **Figure S2 Scaffold localization of cytochrome P450s in *P. xylostella*.** The scaffold

44 numbers are indicated at the top of the each bar. The P450 gene names and their

45 distance (kilobases, kb) between two nearby genes are displayed on the right and left

46 of each bar. Tandemly duplicated genes that are supposed to be separated by 0 - 5

47 genes are in black, and genes that are not tandemly distributed are in red.

48



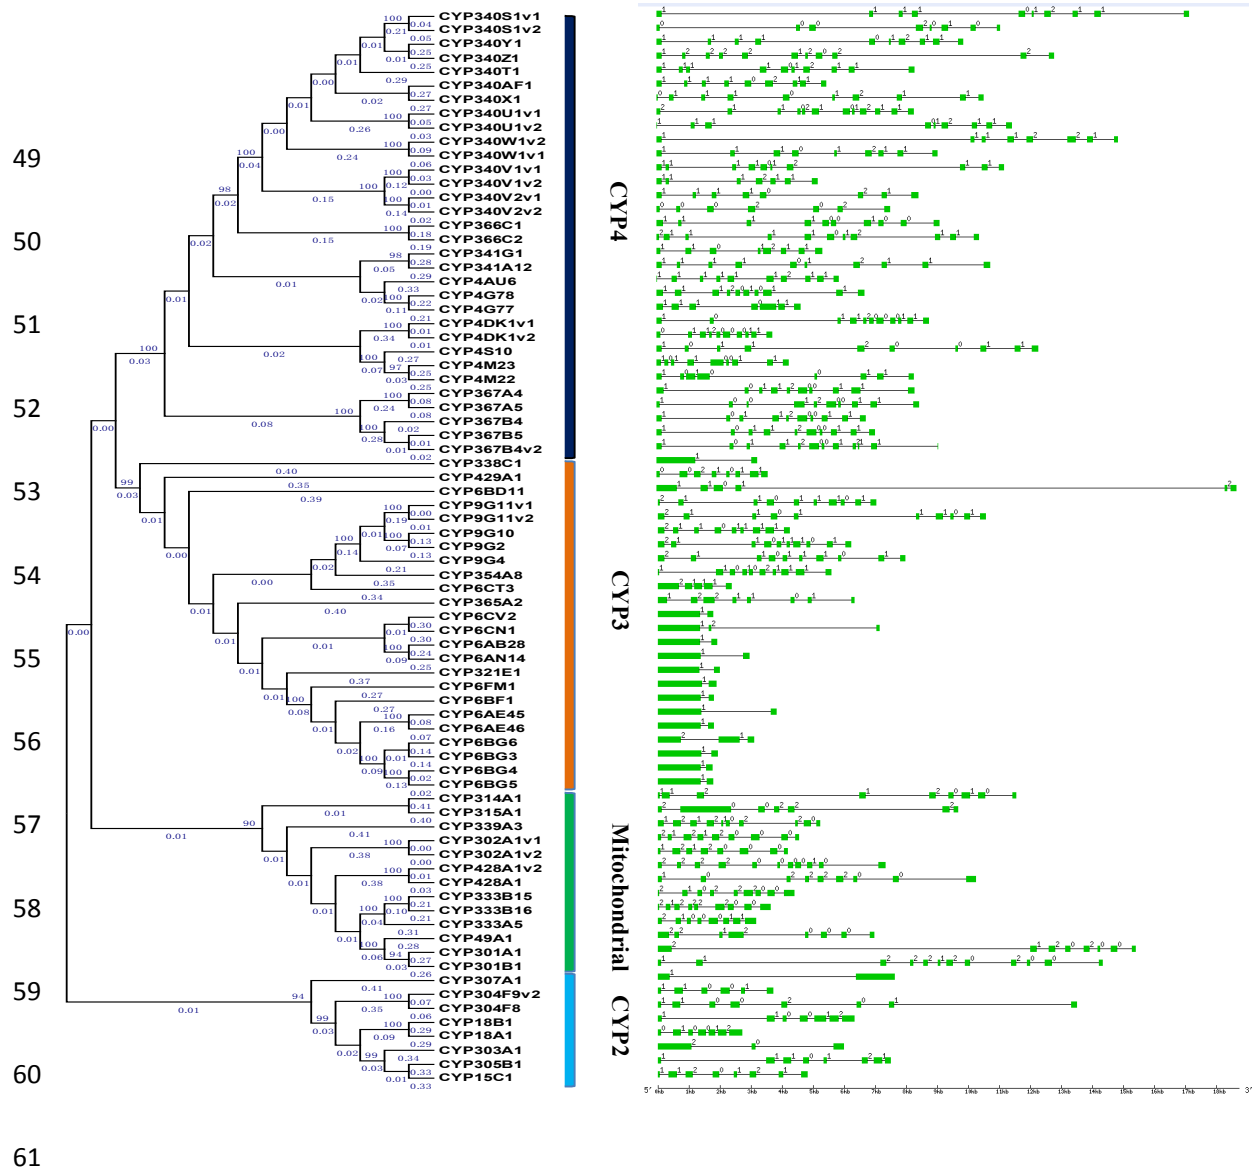

62 **Figure S3 Phylogenetic tree and gene architecture of cytochrome P450s in *P.***  
 63 ***xylostella*.** On the left is the phylogenetic relationship between more than 300 amino  
 64 acid residues of the P450s. Only Bootstrap values larger than 90% are displayed. On  
 65 the right is the gene architecture. The green bar represents exons, and black lines  
 66 represent introns. The digits on the black line represent the intron phase, and three  
 67 types of intron phases exist in eukaryotic genes and are represented by phases 0, 1, 2.  
 68 The scaled line on the right bottom measures the gene length.

69

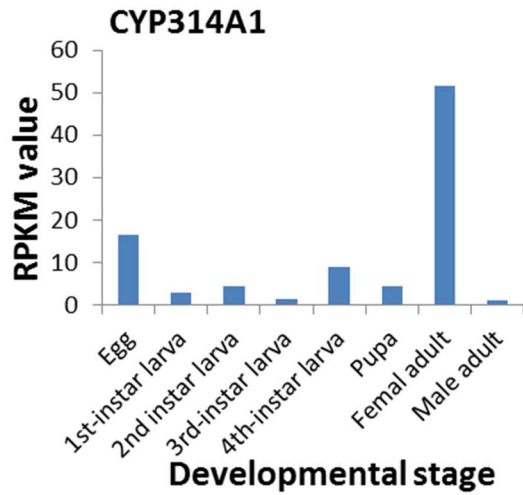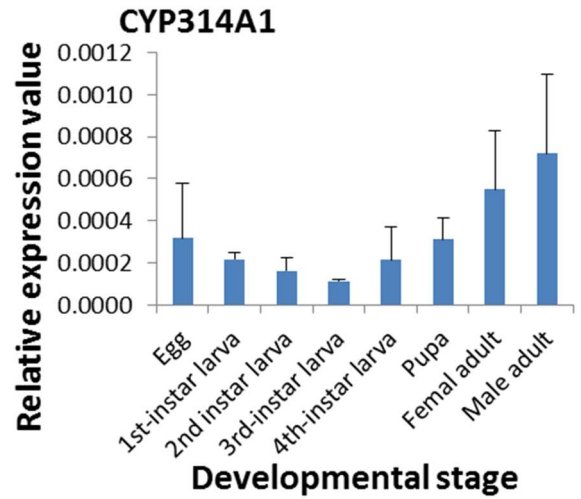

70

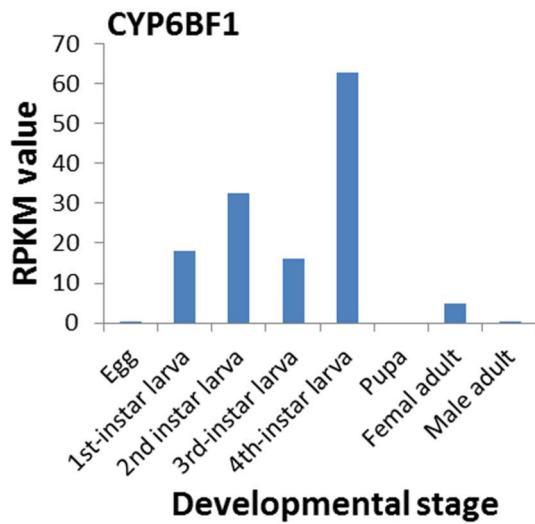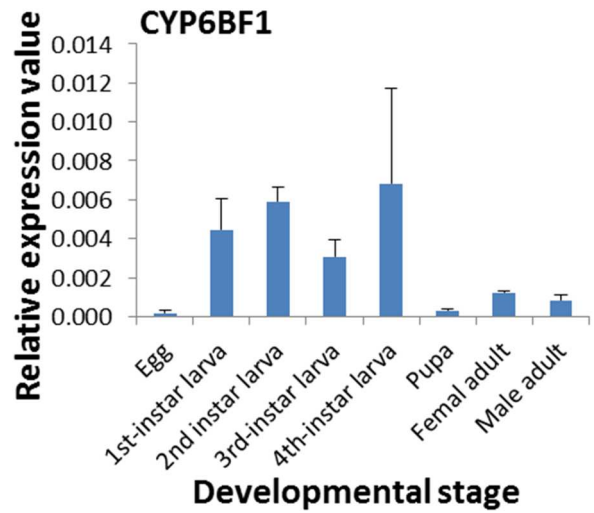

71

72

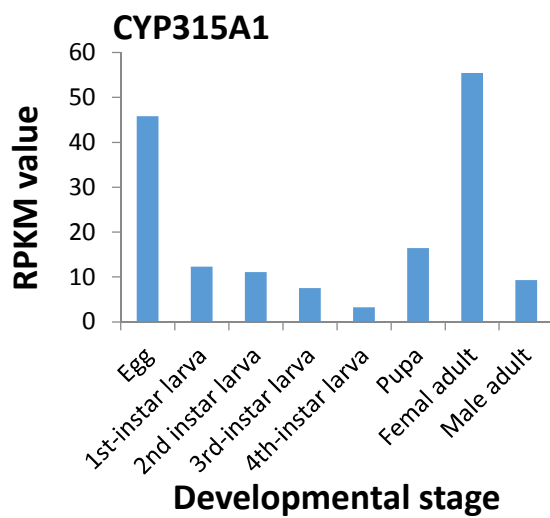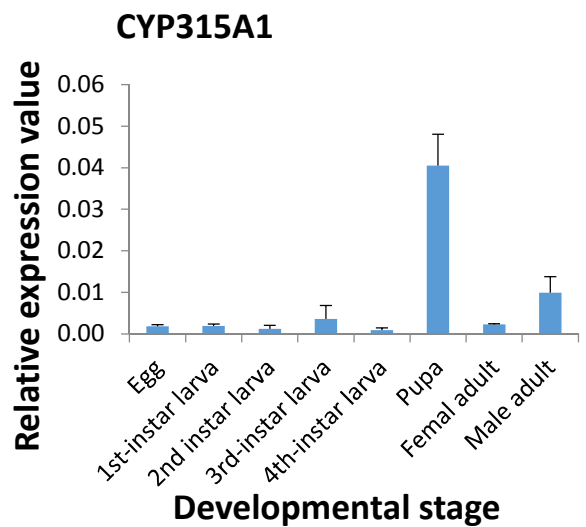

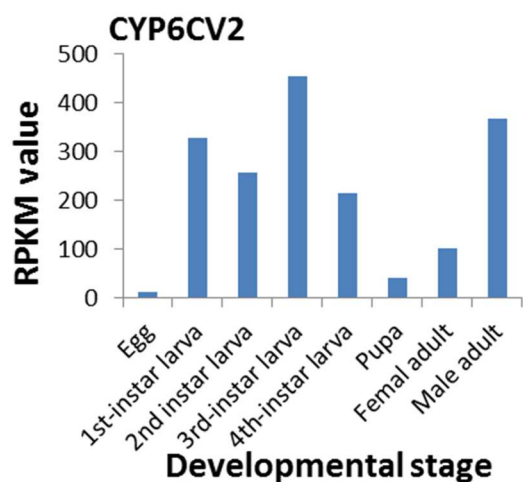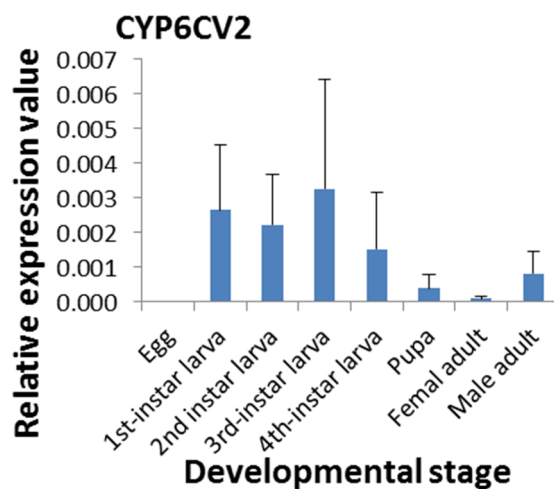

73

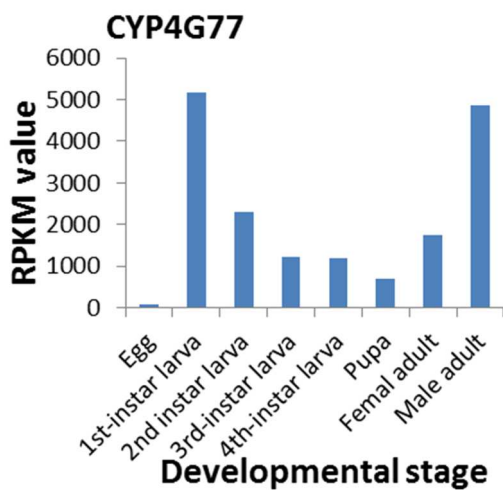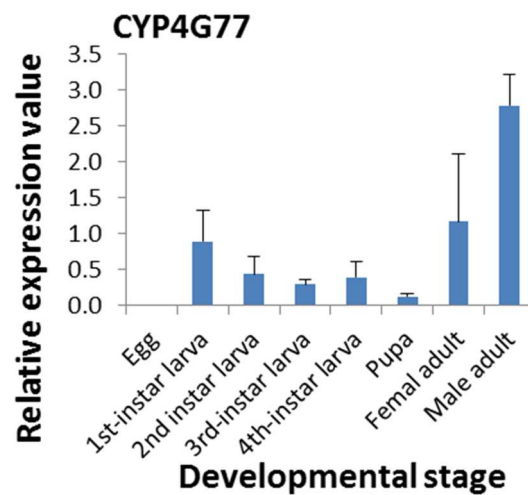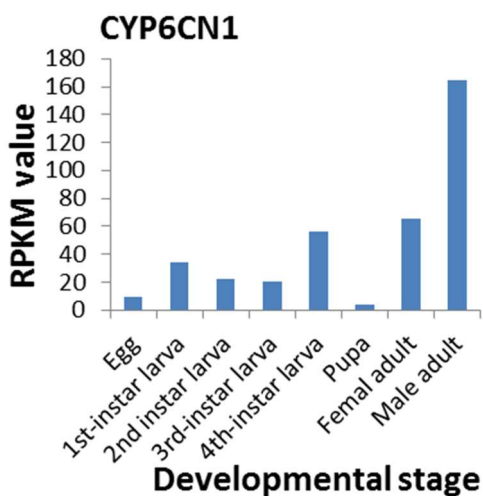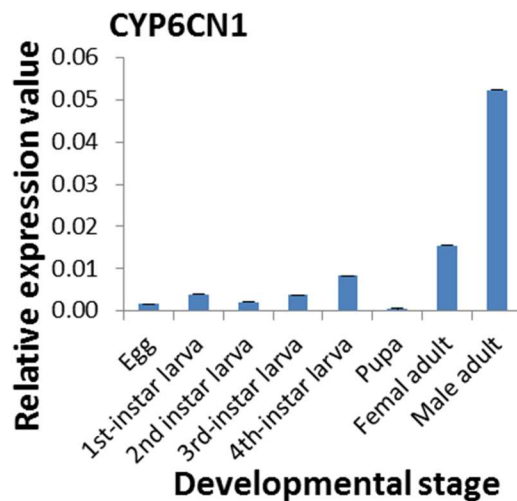

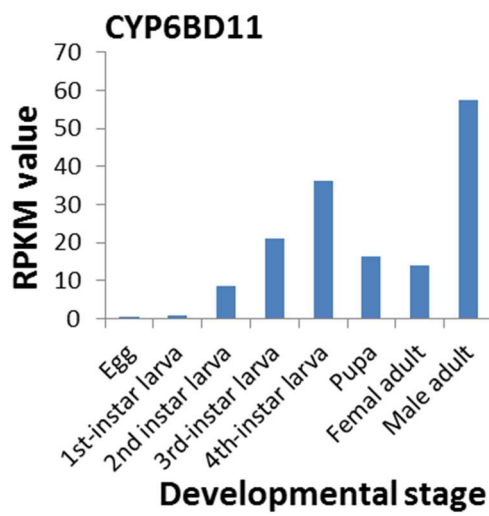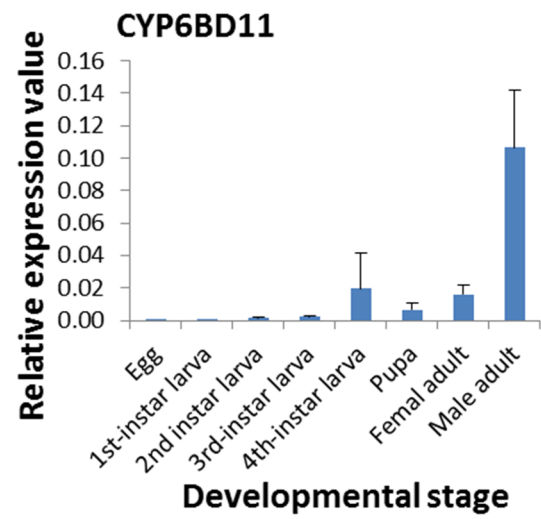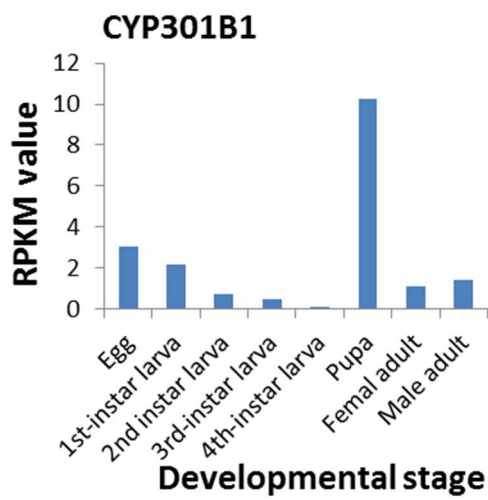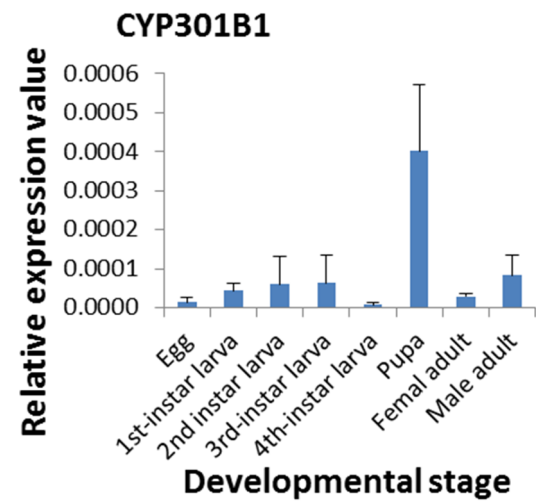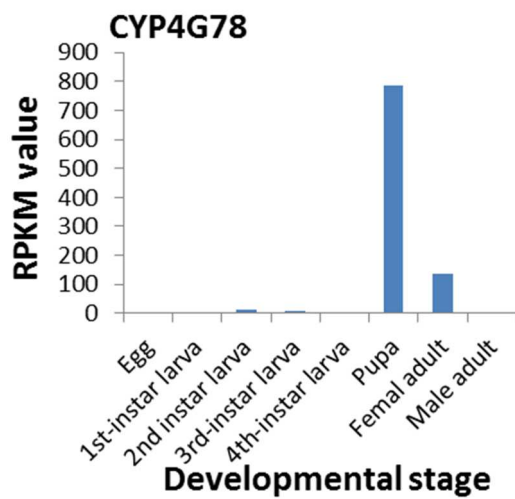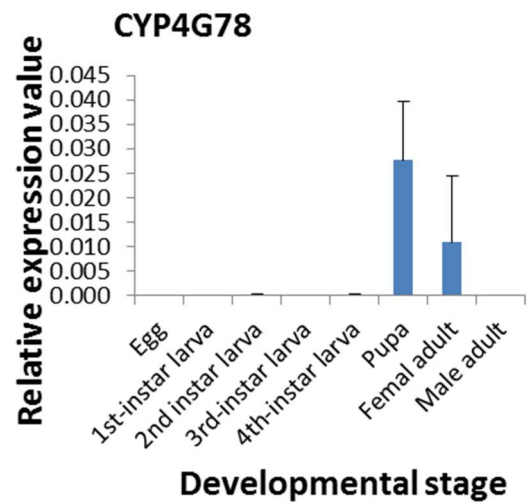

75

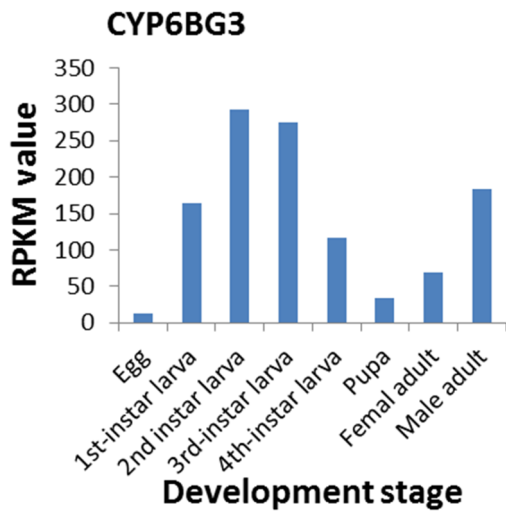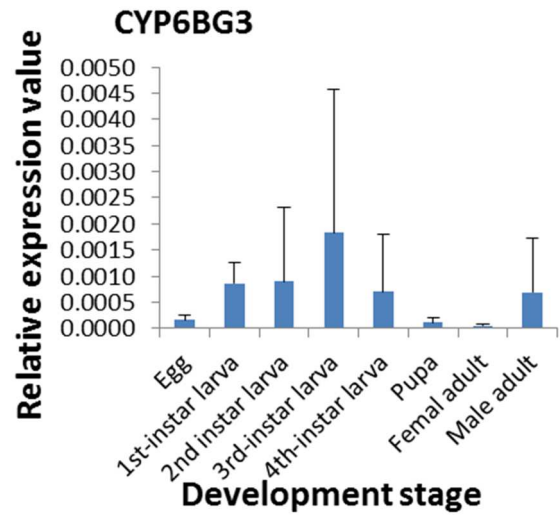

76

77 **Figure S4 Stage-specific gene expression analysis of 10 *P. sylostella* P450s based**

78 **on RNA-Seq (left) and qRT-PCR validation (right).**

79

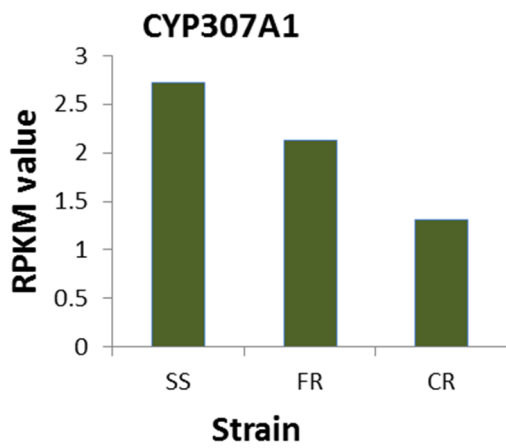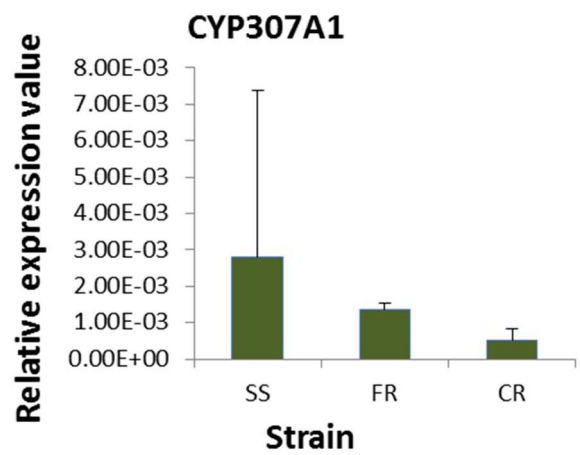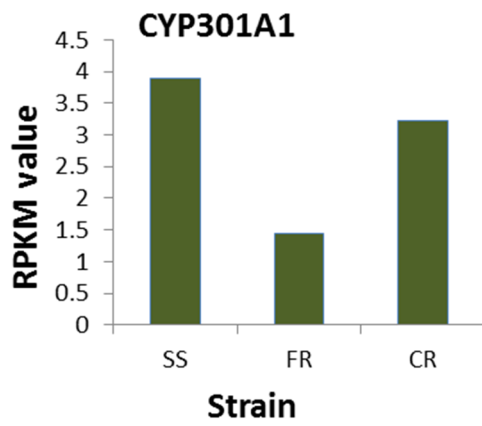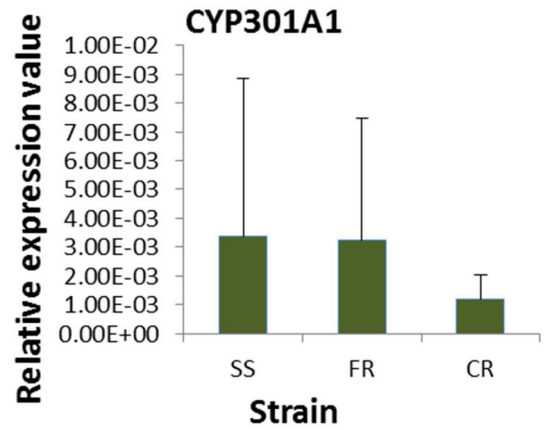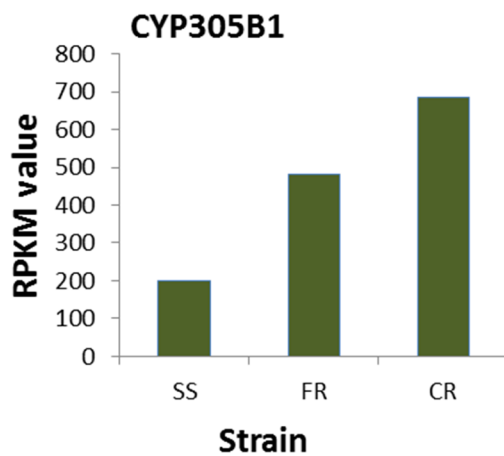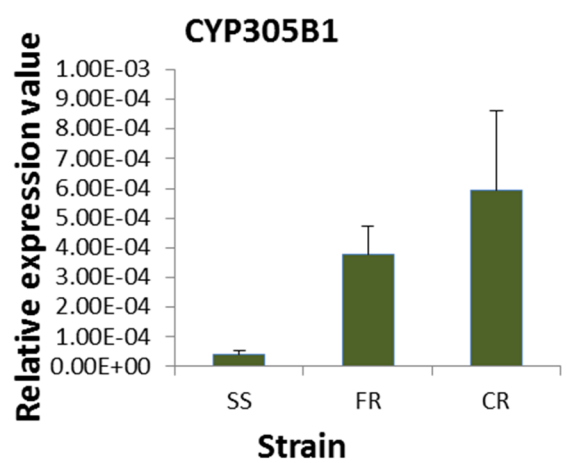

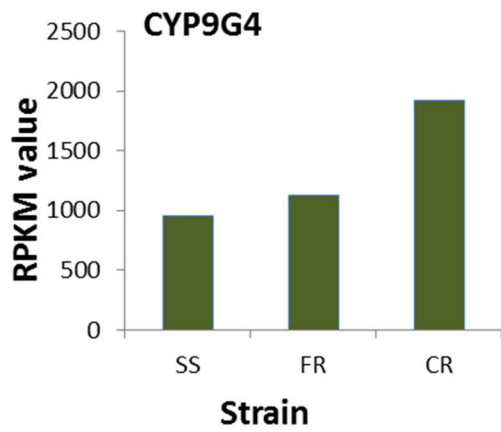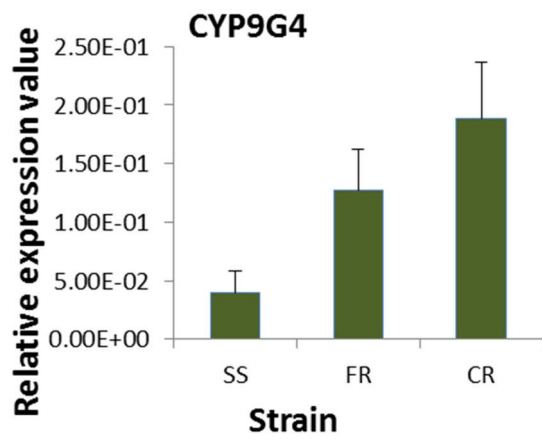

81

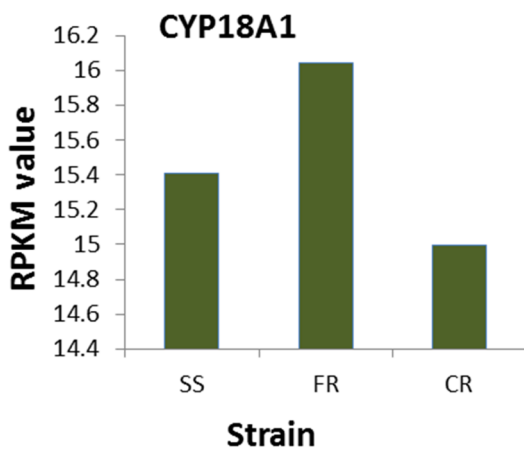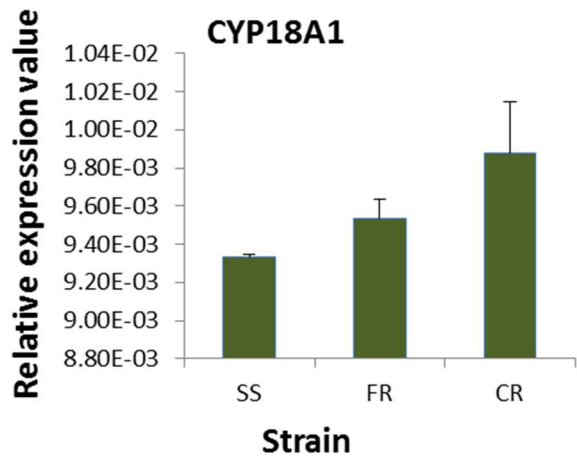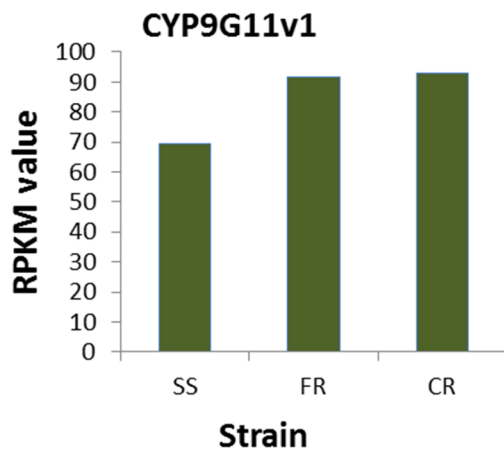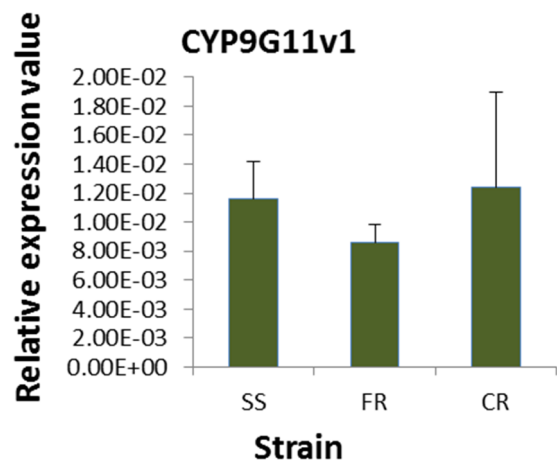

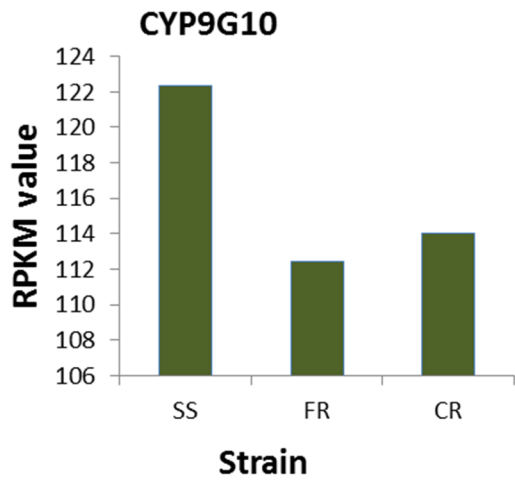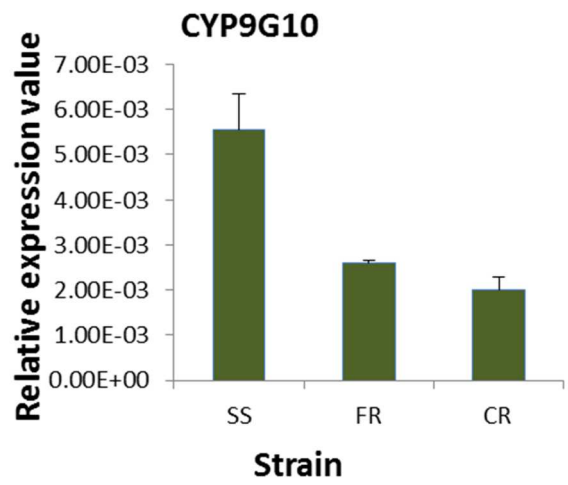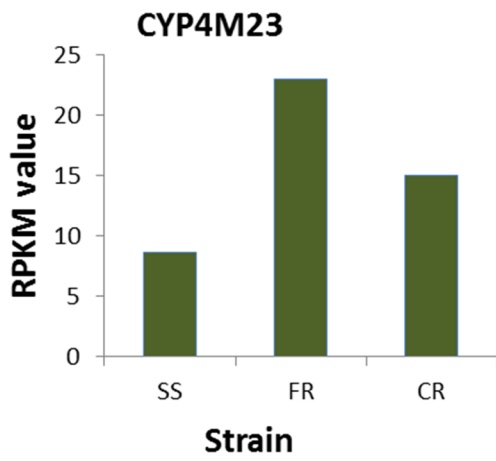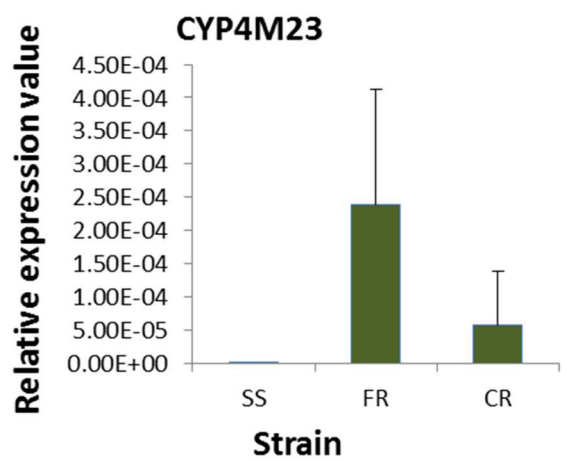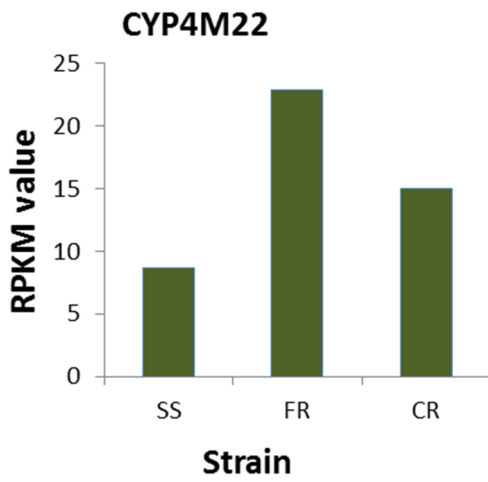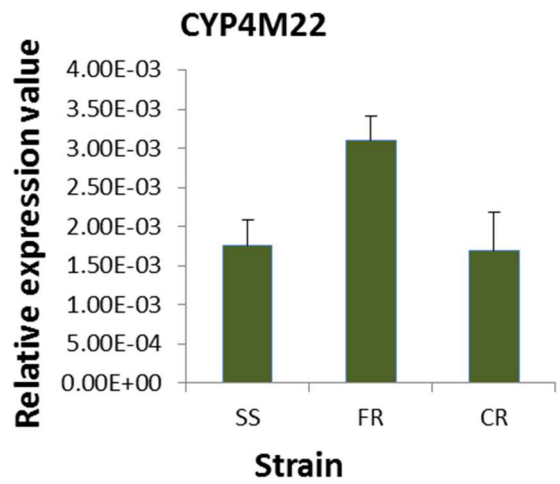



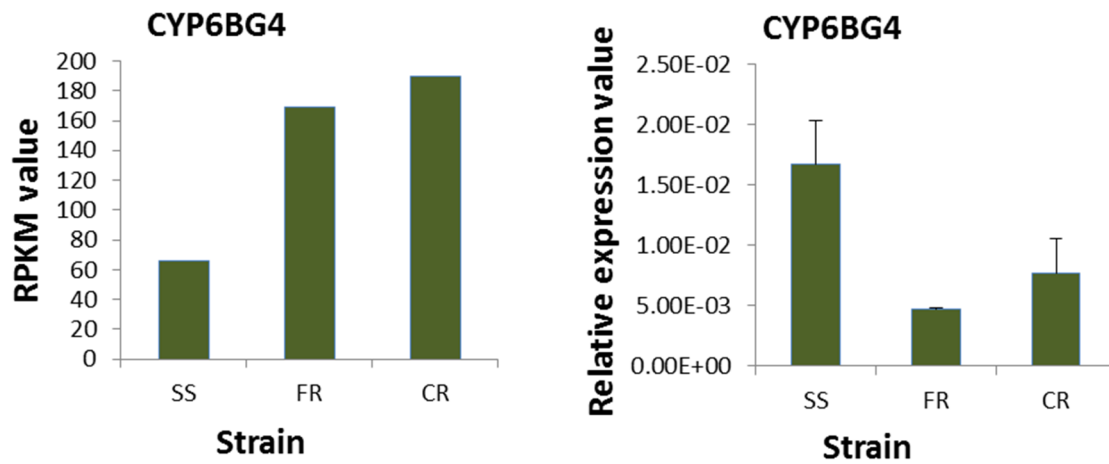

83

84 **Figure S5 Strain-specific gene expression analysis of 10 *P. xylostella* P450s based**  
85 **on RNA-Seq (left) and qRT-PCR validation (right).** SS represents 3rd-instar larva  
86 from the susceptible strain; FR 3rd-instar larva from the fipronil-resistant strain; and  
87 CR 3rd-instar larva from the chlorpyrifos-resistant strain.
